# Supplementary material
Source: PubMed Central journal article supplement (PMC3897434)
Supplement: supp_WNL.0000000000000013_Appendix_e-3_Complete_Search_Strategy.pdf [file supp_WNL.0000000000000013_Appendix_e-3_Complete_Search_Strategy.pdf]

### Appendix e-3: Complete search strategy

The authors initially performed database searches for all studies published in regard to cognitive and emotional disorders in multiple sclerosis. The final guideline focuses solely on emotional disorders. The search strategy presents all results pertaining to emotional disorders unless a search included data on both cognitive and emotional disorders with respect to a particular topic (e.g., interventions).

#### *Medline search strategy*

While the staff of HealthSearch makes every effort to ensure that the information gathered is accurate and up-to-date, HealthSearch disclaims any warranties regarding the accuracy or completeness of the information or its fitness for a particular purpose. HealthSearch provides information from public sources both in electronic and print formats and does not guarantee its accuracy, completeness or reliability. The information provided is only for the use of the Client and no liability is accepted by HealthSearch to third parties.

Database: Ovid MEDLINE(R) <1950 to February Week 1 2007>

Search Strategy:

- 
- 1 multiple sclerosis/ or multiple sclerosis, chronic progressive/ or multiple sclerosis, relapsing-remitting/ or neuromyelitis optica/ (28475)
  - 2 Demyelinating Diseases/ (7686)
  - 3 clinically isolated syndrome.mp. (67)
  - 4 first demyelinating event.mp. (23)
  - 5 multiple sclerosis.mp. (33263)
  - 6 Demyelinating Disease:.mp. (9613)
  - 7 disseminated sclerosis.mp. (491)
  - 8 or/1-7 (40459)
  - 9 affective symptoms/ (8380)
  - 10 emotions/ or affect/ or irritable mood/ or exp anxiety/ (70058)
  - 11 mood disorders/ or affective disorders, psychotic/ or bipolar disorder/ or cyclothymic disorder/ or depressive disorder/ or depression, postpartum/ or depressive disorder, major/ or dysthymic disorder/ or seasonal affective disorder/ (73853)
  - 12 mood swing:.mp. (239)
  - 13 emotional disorder:.mp. (1046)
  - 14 emotional symptom:.mp. (340)
  - 15 affective disorder:.mp. (11201)
  - 16 affective symptom:.mp. (9043)
  - 17 mood disorder:.mp. (9866)
  - 18 or/9-17 (152007)
  - 19 and/8,18 (569)
  - 20 limit 19 to humans (558)
  - 21 limit 20 to "diagnosis (optimized)" (33)
  - 22 intelligence tests/ or wechsler scales/ (13490)
  - 23 wechsler adult intelligence scale.mp. (904)
  - 24 digit span.mp. (1056)
  - 25 similarities.mp. (38449)
  - 26 digit symbol.mp. (1047)
  - 27 digit coding.mp. (27)

- 28 letter number sequencing.mp. (21)
- 29 vocabulary.mp. (7917)
- 30 arithmetic.mp. (4269)
- 31 or/24-30 (52190)
- 32 halstead reitan neuropsychological battery.mp. (64)
- 33 (22 or 23) and 31 (1217)
- 34 or/22-23,32-33 (13876)
- 35 and/19,34 (7)
- 36 limit 35 to humans (7)
- 37 cohort studies/ or longitudinal studies/ or follow-up studies/ or prospective studies/ or case-control studies/ or retrospective studies/ or randomized controlled trials/ or meta-analysis/ (907967)
- 38 and/19,37 (62)
- 39 limit 38 to humans (62)
- 40 limit 19 to (humans and systematic reviews) (18)
- 41 limit 19 to (humans and (meta analysis or randomized controlled trial or "review")) (139)
- 42 or/39-41 (193)

*Medline somatoform search strategy*

While the staff of HealthSearch makes every effort to ensure that the information gathered is accurate and up-to-date, HealthSearch disclaims any warranties regarding the accuracy or completeness of the information or its fitness for a particular purpose. HealthSearch provides information from public sources both in electronic and print formats and does not guarantee its accuracy, completeness or reliability. The information provided is only for the use of the Client and no liability is accepted by HealthSearch to third parties.

Database: Ovid MEDLINE(R) <1950 to March Week 2 2007>

Search Strategy:

- 
- 1 multiple sclerosis/ or multiple sclerosis, chronic progressive/ or multiple sclerosis, relapsing-remitting/ or neuromyelitis optica/ (28777)
  - 2 Demyelinating Diseases/ (7813)
  - 3 clinically isolated syndrome.mp. (69)
  - 4 first demyelinating event.mp. (23)
  - 5 multiple sclerosis.mp. (33656)
  - 6 Demyelinating Disease:.mp. (9769)
  - 7 disseminated sclerosis.mp. (493)
  - 8 or/1-7 (40971)
  - 9 cohort studies/ or longitudinal studies/ or follow-up studies/ or prospective studies/ or case-control studies/ or retrospective studies/ or randomized controlled trials/ or meta-analysis/ (917869)
  - 10 cohort stud:.tw. (28722)
  - 11 longitudinal stud:.tw. (22684)
  - 12 follow-up stud:.tw. (25498)
  - 13 prospective stud:.tw. (68086)
  - 14 case control stud:.tw. (30007)
  - 15 retrospective stud:.tw. (43759)
  - 16 randomized controlled trial:.tw. (18316)
  - 17 meta analysis.tw. (13874)
  - 18 review:.tw. (635709)
  - 19 case series.tw. (11660)
  - 20 or/10-19 (854377)
  - 21 exp somatoform disorders/ or conversion disorder/ or hypochondriasis/ (9534)
  - 22 factitious disorders/ or munchausen syndrome/ (2005)
  - 23 Malingering/ (1743)
  - 24 Psychophysiologic Disorders/ (15842)
  - 25 Neurocirculatory Asthenia/ (1209)
  - 26 somatoform disorder:.tw. (760)
  - 27 somatization disorder:.mp. (415)
  - 28 pain disorder:.mp. (627)
  - 29 conversion disorder:.tw. (394)
  - 30 hypochondriasis.tw. (862)
  - 31 factitious disorder:.tw. (275)
  - 32 malingering.tw. (786)
  - 33 or/21-32 (29583)
  - 34 and/8,20,33 (5)

35 and/8-9,33 (3)  
36 or/34-35 (8)  
37 limit 36 to humans (8)  
38 exp Movement Disorders/ (64155)  
39 disorder:.mp. (912601)  
40 (medication adj4 induce:).mp. (475)  
41 (movement adj2 disorder:).mp. (15261)  
42 40 and (38 or 39 or 41) (169)  
43 and/8-9,42 (0)  
44 and/8,42 (1)  
45 limit 44 to humans (1)  
46 (relation: adj2 problem:).mp. (1253)  
47 Mental Disorders/ (88830)  
48 general medical condition:.mp. (240)  
49 (mental adj2 disorder:).mp. (98291)  
50 exp Parent-Child Relations/ (33218)  
51 partner:.mp. (49854)  
52 family/ or intergenerational relations/ or sibling relations/ or nuclear family/ or siblings/ or  
spouses/ (57105)  
53 sibling:.mp. (26855)  
54 (parent and child:).mp. (33427)  
55 or/47-54 (256810)  
56 and/46,55 (322)  
57 and/8-9,56 (0)  
58 and/8,20,56 (0)  
59 and/8,56 (1)  
60 limit 59 to humans (1)  
61 from 60 keep 1 (1)  
62 Treatment Refusal/ (8129)  
63 Patient Compliance/ (30790)  
64 Cooperative Behavior/ (10916)  
65 Patient Dropouts/ (4374)  
66 bereavement/ or grief/ (7680)  
67 (academic adj2 problem:).mp. (286)  
68 (occupational adj2 problem:).mp. (789)  
69 Workplace/ (6131)  
70 work place.tw. (967)  
71 workplace.tw. (11421)  
72 or/62-71 (76921)  
73 and/8-9,72 (35)  
74 and/8,20,72 (26)  
75 or/73-74 (48)  
76 limit 75 to humans (48)

*Medline adjustment search strategy*

While the staff of HealthSearch makes every effort to ensure that the information gathered is accurate and up-to-date, HealthSearch disclaims any warranties regarding the accuracy or completeness of the information or its fitness for a particular purpose. HealthSearch provides information from public sources both in electronic and print formats and does not guarantee its accuracy, completeness or reliability. The information provided is only for the use of the Client and no liability is accepted by HealthSearch to third parties.

Database: Ovid MEDLINE(R) <1950 to March Week 1 2007>

Search Strategy:

- 
- 1 multiple sclerosis/ or multiple sclerosis, chronic progressive/ or multiple sclerosis, relapsing-remitting/ or neuromyelitis optica/ (28749)
  - 2 Demyelinating Diseases/ (7805)
  - 3 clinically isolated syndrome.mp. (68)
  - 4 first demyelinating event.mp. (23)
  - 5 multiple sclerosis.mp. (33618)
  - 6 Demyelinating Disease:.mp. (9758)
  - 7 disseminated sclerosis.mp. (493)
  - 8 or/1-7 (40925)
  - 9 cohort studies/ or longitudinal studies/ or follow-up studies/ or prospective studies/ or case-control studies/ or retrospective studies/ or randomized controlled trials/ or meta-analysis/ (916321)
  - 10 cohort stud:.tw. (28631)
  - 11 longitudinal stud:.tw. (22619)
  - 12 follow-up stud:.tw. (25465)
  - 13 prospective stud:.tw. (67972)
  - 14 case control stud:.tw. (29943)
  - 15 retrospective stud:.tw. (43685)
  - 16 randomized controlled trial:.tw. (18236)
  - 17 meta analysis.tw. (13824)
  - 18 review:.tw. (634551)
  - 19 case series.tw. (11615)
  - 20 or/10-19 (852726)
  - 21 Adjustment Disorders/ (3403)
  - 22 anxiety/ (33276)
  - 23 depressed mood:.mp. (1861)
  - 24 21 and (22 or 23) (282)
  - 25 or/21,24 (3403)
  - 26 and/8,20,25 (2)
  - 27 limit 26 to humans (2)
  - 28 and/8-9,25 (1)
  - 29 limit 28 to humans (1)
  - 30 or/27,29 (2)
  - 31 Euphoria/ (740)
  - 32 euphoria.tw. (966)
  - 33 or/31-32 (1511)
  - 34 and/8-9,33 (2)
  - 35 and/8,20,33 (8)

- 36 or/34-35 (10)
- 37 limit 36 to humans (10)
- 38 exp Personality Disorders/ (23662)
- 39 Mental Disorders/ (88744)
- 40 personality/ or assertiveness/ or authoritarianism/ or machiavellianism/ or negativism/  
(27660)
- 41 (personality adj2 disorder:).mp. (23864)
- 42 or/38-41 (136201)
- 43 and/8-9,42 (15)
- 44 and/8,20,42 (37)
- 45 or/43-44 (47)
- 46 limit 45 to humans (46)
- 47 exp Sleep Disorders/ (35520)
- 48 (sleep adj2 disorder:).mp. (14072)
- 49 or/47-48 (36592)
- 50 and/8-9,49 (7)
- 51 and/8,20,49 (18)
- 52 or/50-51 (23)
- 53 limit 52 to humans (23)

*Medline anxiety search strategy*

While the staff of HealthSearch makes every effort to ensure that the information gathered is accurate and up-to-date, HealthSearch disclaims any warranties regarding the accuracy or completeness of the information or its fitness for a particular purpose. HealthSearch provides information from public sources both in electronic and print formats and does not guarantee its accuracy, completeness or reliability. The information provided is only for the use of the Client and no liability is accepted by HealthSearch to third parties.

Database: Ovid MEDLINE(R) <1950 to March Week 1 2007>

Search Strategy:

- 
- 1 multiple sclerosis/ or multiple sclerosis, chronic progressive/ or multiple sclerosis, relapsing-remitting/ or neuromyelitis optica/ (28749)
  - 2 Demyelinating Diseases/ (7805)
  - 3 clinically isolated syndrome.mp. (68)
  - 4 first demyelinating event.mp. (23)
  - 5 multiple sclerosis.mp. (33618)
  - 6 Demyelinating Disease:.mp. (9758)
  - 7 disseminated sclerosis.mp. (493)
  - 8 or/1-7 (40925)
  - 9 cohort studies/ or longitudinal studies/ or follow-up studies/ or prospective studies/ or case-control studies/ or retrospective studies/ or randomized controlled trials/ or meta-analysis/ (916321)
  - 10 cohort stud:.tw. (28631)
  - 11 longitudinal stud:.tw. (22619)
  - 12 follow-up stud:.tw. (25465)
  - 13 prospective stud:.tw. (67972)
  - 14 case control stud:.tw. (29943)
  - 15 retrospective stud:.tw. (43685)
  - 16 randomized controlled trial:.tw. (18236)
  - 17 meta analysis.tw. (13824)
  - 18 review:.tw. (634551)
  - 19 Anxiety/ (33276)
  - 20 anxiety disorders/ or agoraphobia/ or obsessive-compulsive disorder/ or panic disorder/ or phobic disorders/ or stress disorders, traumatic/ or stress disorders, post-traumatic/ or stress disorders, traumatic, acute/ (39289)
  - 21 Stress, Psychological/ (53620)
  - 22 (anxiety adj2 symptom:).tw. (3034)
  - 23 or/19-22 (119994)
  - 24 case series.tw. (11615)
  - 25 or/10-18,24 (852726)
  - 26 and/8,23,25 (32)
  - 27 and/8-9,23 (41)
  - 28 or/26-27 (63)
  - 29 limit 28 to humans (63)

*Medline intervention search strategy*

While the staff of HealthSearch makes every effort to ensure that the information gathered is accurate and up-to-date, HealthSearch disclaims any warranties regarding the accuracy or completeness of the information or its fitness for a particular purpose. HealthSearch provides information from public sources both in electronic and print formats and does not guarantee its accuracy, completeness or reliability. The information provided is only for the use of the Client and no liability is accepted by HealthSearch to third parties.

Database: Ovid MEDLINE(R) <1950 to March Week 2 2007>

Search Strategy:

-----

- 1 multiple sclerosis/ or multiple sclerosis, chronic progressive/ or multiple sclerosis, relapsing-remitting/ or neuromyelitis optica/ (28777)
- 2 Demyelinating Diseases/ (7813)
- 3 clinically isolated syndrome.mp. (69)
- 4 first demyelinating event.mp. (23)
- 5 multiple sclerosis.mp. (33656)
- 6 Demyelinating Disease:.mp. (9769)
- 7 disseminated sclerosis.mp. (493)
- 8 or/1-7 (40971)
- 9 cohort studies/ or longitudinal studies/ or follow-up studies/ or prospective studies/ or case-control studies/ or retrospective studies/ or randomized controlled trials/ or meta-analysis/ (917869)
- 10 cohort stud:.tw. (28722)
- 11 longitudinal stud:.tw. (22684)
- 12 follow-up stud:.tw. (25498)
- 13 prospective stud:.tw. (68086)
- 14 case control stud:.tw. (30007)
- 15 retrospective stud:.tw. (43759)
- 16 randomized controlled trial:.tw. (18316)
- 17 meta analysis.tw. (13874)
- 18 review:.tw. (635709)
- 19 case series.tw. (11660)
- 20 or/10-19 (854377)
- 21 exp Antidepressive Agents/ (92122)
- 22 antidepressant:.tw. (27113)
- 23 exp serotonin antagonists/ or exp serotonin uptake inhibitors/ (55950)
- 24 ssri:.mp. (3492)
- 25 tca:.mp. (5339)
- 26 exp Monoamine Oxidase Inhibitors/ (17177)
- 27 "tricyclic antidepressant:".mp. (6380)
- 28 "monoamine oxidase inhibitor:".mp. (9189)
- 29 "selected serotonin reuptake inhibitor:".mp. (2)
- 30 tranquilizing agents/ or exp anti-anxiety agents/ or exp antipsychotic agents/ (160925)
- 31 theales/ or hypericum/ (1181)
- 32 Plant Extracts/ (34063)
- 33 Plants, Medicinal/ (42930)
- 34 (tranquilizer: or anxiolytic: or antipsychotic: or neuroleptic: or "st johns wort" or "st john's wort").mp. (47490)

35 behavior therapy/ or cognitive therapy/ or relaxation techniques/ or meditation/ (28947)  
36 "cognitive rehabilitation".mp. (268)  
37 "cognitive therap:".mp. (7139)  
38 (cognitive adj1 (behavior or behavioural) adj1 therap:).mp. (1037)  
39 ((behavior or behavior) adj1 therap:).mp. (19206)  
40 Relaxation/ (1414)  
41 stress manag:.mp. (1497)  
42 relax:.mp. (86824)  
43 meditat:.mp. (1518)  
44 mindfulness.mp. (196)  
45 exp Psychological Tests/ (123772)  
46 psychological screening test:.mp. (14)  
47 psychometric test:.mp. (1864)  
48 Interview, Psychological/ (7719)  
49 psychiatric interview:.mp. (1166)  
50 psychological test:.mp. (30034)  
51 psychological interview:.mp. (94)  
52 exp Neuropsychological Tests/ (32388)  
53 (neuropsychological and (batter: or test:)).mp. (34856)  
54 exp Psychotherapy/ (111587)  
55 psychotherapy, group/ or couples therapy/ or family therapy/ (15339)  
56 (psychotherapy and (individual: or group: or couple: or famil:)).mp. (19285)  
57 psychotherap:.mp. (51450)  
58 or/21-57 (654285)  
59 and/8-9,58 (214)  
60 and/8,20,58 (200)  
61 or/59-60 (355)  
62 limit 61 to humans (352)

*Medline pathological laughing and crying search strategy*

While the staff of HealthSearch makes every effort to ensure that the information gathered is accurate and up-to-date, HealthSearch disclaims any warranties regarding the accuracy or completeness of the information or its fitness for a particular purpose. HealthSearch provides information from public sources both in electronic and print formats and does not guarantee its accuracy, completeness or reliability. The information provided is only for the use of the Client and no liability is accepted by HealthSearch to third parties.

Database: Ovid MEDLINE(R) <1950 to March Week 2 2007>

Search Strategy:

- 
- 1 multiple sclerosis/ or multiple sclerosis, chronic progressive/ or multiple sclerosis, relapsing-remitting/ or neuromyelitis optica/ (28777)
  - 2 Demyelinating Diseases/ (7813)
  - 3 clinically isolated syndrome.mp. (69)
  - 4 first demyelinating event.mp. (23)
  - 5 multiple sclerosis.mp. (33656)
  - 6 Demyelinating Disease:.mp. (9769)
  - 7 disseminated sclerosis.mp. (493)
  - 8 or/1-7 (40971)
  - 9 cohort studies/ or longitudinal studies/ or follow-up studies/ or prospective studies/ or case-control studies/ or retrospective studies/ or randomized controlled trials/ or meta-analysis/ (917869)
  - 10 cohort stud:.tw. (28722)
  - 11 longitudinal stud:.tw. (22684)
  - 12 follow-up stud:.tw. (25498)
  - 13 prospective stud:.tw. (68086)
  - 14 case control stud:.tw. (30007)
  - 15 retrospective stud:.tw. (43759)
  - 16 randomized controlled trial:.tw. (18316)
  - 17 meta analysis.tw. (13874)
  - 18 review:.tw. (635709)
  - 19 case series.tw. (11660)
  - 20 or/10-19 (854377)
  - 21 paralysis/ or pseudobulbar palsy/ (14179)
  - 22 Bulbar Palsy, Progressive/ (629)
  - 23 (pathological adj2 laugh:).mp. (114)
  - 24 (pathological adj2 (crying or weeping)).mp. (46)
  - 25 (emotional adj2 incontinence).mp. (61)
  - 26 involuntary emotional expression disorder:.mp. (1)
  - 27 or/21-26 (14974)
  - 28 and/8-9,27 (15)
  - 29 limit 28 to humans (15)
  - 30 and/8,20,27 (21)
  - 31 limit 30 to humans (20)
  - 32 or/29,31 (32)
  - 33 from 32 keep 1-32 (32)
  - 34 medical condition:.mp. (7619)
  - 35 (psychological adj2 factor:).mp. (4341)

36 exp Mental Disorders/ (647182)  
37 (psychological adj2 symptom:).mp. (2746)  
38 (personality adj2 trait:).mp. (4126)  
39 Adaptation, Psychological/ (48064)  
40 maladaptive health behavior:.mp. (3)  
41 general medical condition:.mp. (240)  
42 or/35-40 (688667)  
43 or/34,42 (694794)  
44 and/42-43 (688667)  
45 and/8-9,44 (209)  
46 limit 45 to humans (209)  
47 and/8,20,44 (332)  
48 limit 47 to humans (326)  
49 or/46,48 (483)  
50 from 49 keep 1-483 (483)

*Medline psychosis search strategy*

While the staff of HealthSearch makes every effort to ensure that the information gathered is accurate and up-to-date, HealthSearch disclaims any warranties regarding the accuracy or completeness of the information or its fitness for a particular purpose. HealthSearch provides information from public sources both in electronic and print formats and does not guarantee its accuracy, completeness or reliability. The information provided is only for the use of the Client and no liability is accepted by HealthSearch to third parties.

Database: Ovid MEDLINE(R) <1950 to March Week 1 2007>

Search Strategy:

- 
- 1 multiple sclerosis/ or multiple sclerosis, chronic progressive/ or multiple sclerosis, relapsing-remitting/ or neuromyelitis optica/ (28749)
  - 2 Demyelinating Diseases/ (7805)
  - 3 clinically isolated syndrome.mp. (68)
  - 4 first demyelinating event.mp. (23)
  - 5 multiple sclerosis.mp. (33618)
  - 6 Demyelinating Disease:.mp. (9758)
  - 7 disseminated sclerosis.mp. (493)
  - 8 or/1-7 (40925)
  - 9 cohort studies/ or longitudinal studies/ or follow-up studies/ or prospective studies/ or case-control studies/ or retrospective studies/ or randomized controlled trials/ or meta-analysis/ (916321)
  - 10 cohort stud:.tw. (28631)
  - 11 longitudinal stud:.tw. (22619)
  - 12 follow-up stud:.tw. (25465)
  - 13 prospective stud:.tw. (67972)
  - 14 case control stud:.tw. (29943)
  - 15 retrospective stud:.tw. (43685)
  - 16 randomized controlled trial:.tw. (18236)
  - 17 meta analysis.tw. (13824)
  - 18 review:.tw. (634551)
  - 19 case series.tw. (11615)
  - 20 or/10-19 (852726)
  - 21 psychosis.mp. (13742)
  - 22 exp Psychotic Disorders/ (28462)
  - 23 (psychotic adj2 disorder:).mp. (25720)
  - 24 psychoses.mp. (11964)
  - 25 exp Schizophrenia/ (61406)
  - 26 (schizophreniform adj2 disorder:).mp. (345)
  - 27 (schizoaffective adj2 disorder:).mp. (1836)
  - 28 schizophrenia.tw. (43727)
  - 29 (delusional adj2 disorder:).mp. (449)
  - 30 Paranoid Disorders/ (3313)
  - 31 or/21-30 (100391)
  - 32 and/8,20,31 (51)
  - 33 and/8-9,31 (13)
  - 34 or/32-33 (60)
  - 35 limit 34 to humans (60)

- 36 Spouse Abuse/ (3296)
- 37 sex offenses/ or rape/ (7094)
- 38 (physical adj4 abus:).tw. (3083)
- 39 (sexual adj4 abus:).tw. (6201)
- 40 (neglect: or abus:).tw. (78300)
- 41 or/36-40 (85590)
- 42 and/8-9,41 (9)
- 43 and/8,20,41 (23)
- 44 or/42-43 (28)
- 45 limit 44 to humans (28)

*Medline tests search strategy*

While the staff of HealthSearch makes every effort to ensure that the information gathered is accurate and up-to-date, HealthSearch disclaims any warranties regarding the accuracy or completeness of the information or its fitness for a particular purpose. HealthSearch provides information from public sources both in electronic and print formats and does not guarantee its accuracy, completeness or reliability. The information provided is only for the use of the Client and no liability is accepted by HealthSearch to third parties.

Database: Ovid MEDLINE(R) <1950 to March Week 2 2007>

Search Strategy:

- 
- 1 multiple sclerosis/ or multiple sclerosis, chronic progressive/ or multiple sclerosis, relapsing-remitting/ or neuromyelitis optica/ (28777)
  - 2 Demyelinating Diseases/ (7813)
  - 3 clinically isolated syndrome.mp. (69)
  - 4 first demyelinating event.mp. (23)
  - 5 multiple sclerosis.mp. (33656)
  - 6 Demyelinating Disease:.mp. (9769)
  - 7 disseminated sclerosis.mp. (493)
  - 8 or/1-7 (40971)
  - 9 cohort studies/ or longitudinal studies/ or follow-up studies/ or prospective studies/ or case-control studies/ or retrospective studies/ or randomized controlled trials/ or meta-analysis/ (917869)
  - 10 cohort stud:.tw. (28722)
  - 11 longitudinal stud:.tw. (22684)
  - 12 follow-up stud:.tw. (25498)
  - 13 prospective stud:.tw. (68086)
  - 14 case control stud:.tw. (30007)
  - 15 retrospective stud:.tw. (43759)
  - 16 randomized controlled trial:.tw. (18316)
  - 17 meta analysis.tw. (13874)
  - 18 review:.tw. (635709)
  - 19 case series.tw. (11660)
  - 20 or/10-19 (854377)
  - 21 intelligence tests/ or wechsler scales/ (13590)
  - 22 wechsler adult intelligence scale.mp. (916)
  - 23 digit span.mp. (1064)
  - 24 similarities.mp. (38822)
  - 25 digit symbol.mp. (1059)
  - 26 digit coding.mp. (27)
  - 27 letter number sequencing.mp. (21)
  - 28 vocabulary.mp. (8087)
  - 29 arithmetic.mp. (4306)
  - 30 or/23-29 (52785)
  - 31 halstead reitan neuropsychological battery.mp. (64)
  - 32 western aphasia battery.mp. (68)
  - 33 boston diagnostic aphasia examination.mp. (62)
  - 34 token test.mp. (175)
  - 35 controlled oral word association test.mp. (75)

36 COWAT.mp. (24)  
 37 WAIS.mp. (1733)  
 38 or/21-22,37 (14431)  
 39 and/30,38 (1382)  
 40 boston naming test.mp. (189)  
 41 benton visual retention test.mp. (162)  
 42 judgment of line orientation test.mp. (16)  
 43 complex figure test.mp. (120)  
 44 rey auditory verbal learning test.mp. (163)  
 45 RAVLT.mp. (58)  
 46 california verbal learning test.mp. (312)  
 47 (CVLT or CVLT-II).mp. (191)  
 48 SELECTIVE REMINDING TEST.mp. (139)  
 49 SRT.mp. (1050)  
 50 wechsler memory scale.mp. (629)  
 51 WMS.mp. (483)  
 52 "logical memory".mp. (255)  
 53 brief visuospatial memory test.mp. (3)  
 54 BVMT.mp. (3)  
 55 "7/24 spatial recall test".mp. (1)  
 56 "10/36 spatial recall test".mp. (5)  
 57 "paced auditory serial addition test".mp. (99)  
 58 PASAT.mp. (132)  
 59 "symbol digit modalities test".mp. (103)  
 60 SDMT.mp. (44)  
 61 "stroop color word test".mp. (135)  
 62 "stroop colour word test".mp. (26)  
 63 Trail Making Test/ (313)  
 64 "trail making test".mp. (729)  
 65 "delis-kaplan executive function system".mp. (10)  
 66 "wisconsin card sorting test".mp. (882)  
 67 WCST.mp. (518)  
 68 "animal naming".mp. (26)  
 69 "animal fluency".mp. (15)  
 70 "verbal fluency".mp. (1491)  
 71 52 and (50 or 51) (151)  
 72 or/31-36,38-51,53-71 (19636)  
 73 and/8-9,72 (32)  
 74 limit 73 to humans (32)  
 75 and/8,20,72 (10)  
 76 limit 75 to humans (10)  
 77 or/74,76 (36)  
 78 from 77 keep 1-36 (36)

***CINAHL search strategy****CINAHL emotional 1 search strategy*

While the staff of HealthSearch makes every effort to ensure that the information gathered is accurate and up-to-date, HealthSearch disclaims any warranties regarding the accuracy or completeness of the information or its fitness for a particular purpose. HealthSearch provides information from public sources both in electronic and print formats and does not guarantee its accuracy, completeness or reliability. The information provided is only for the use of the Client and no liability is accepted by HealthSearch to third parties.

Database: CINAHL - Cumulative Index to Nursing & Allied Health Literature <1982 to March Week 3 2007>

Search Strategy:

- 
- 1 demyelinating diseases/ or multiple sclerosis/ (3818)
  - 2 (multiple sclerosis or demyelinating disease: or disseminated sclerosis).mp. (4064)
  - 3 (clinically isolated syndrome: or first demyelinating event).mp. (21)
  - 4 or/1-3 (4064)
  - 5 exp case control studies/ or prospective studies/ (64559)
  - 6 Retrospective Design/ (21921)
  - 7 Clinical Trials/ (32353)
  - 8 exp Clinical Research/ (5665)
  - 9 Meta Analysis/ (5168)
  - 10 (cohort stud: or longitudinal stud: or follow up stud: or prospective stud: or (case adj1 control: adj1 stud:) or retrospective stud: or (randomi: adj1 control: adj1 trial:) or meta analysis or meta-analysis or metaanalysis or review: or case series).mp. (164272)
  - 11 or/5-10 (192538)
  - 12 affective disorders/ or depression/ or depression, postpartum/ or depression, reactive/ or dysthymic disorder/ (17948)
  - 13 (emotional symptom: or affective symptom: or mood disorder: or mood swing:).mp. (1091)
  - 14 (depressive symptom: or clinical depression or major depressive disorder: or minor depression or masked depression or "psuedodementia of depression").mp. (5332)
  - 15 exp Factitious Disorders/ (249)
  - 16 depression/ (16159)
  - 17 and/15-16 (8)
  - 18 Bipolar Disorder/ (1410)
  - 19 (mania or hypomania).mp. (361)
  - 20 exp Anxiety/ (6234)
  - 21 anxiety disorders/ or exp obsessive-compulsive disorder/ or panic disorder/ or exp phobic disorders/ or stress disorders, post-traumatic/ (5671)
  - 22 (anxiety symptom: or (acute adj1 stress adj1 disorder:) or (generalized adj1 anxiety adj1 disorder:)).mp. (695)
  - 23 exp Adjustment Disorders/ (109)
  - 24 depressed mood:.mp. (282)
  - 25 23 and (20 or 24) (9)
  - 26 exp Psychotic Disorders/ (20265)
  - 27 (delusional disorder: or schizophreniform disorder: or schizoaffective disorder: or psychosis or psychotic disorder:).mp. (2187)
  - 28 exp Personality Disorders/ (1707)

- 29 or/12-14,17-23,25-28 (48148)
- 30 (emotional disorder: or affective disorder: or depression or dysthymic disorder: or bipolar disorder:).mp. (28192)
- 31 (anxiety or panic disorder: or phobia: or obsessive compulsive disorder: or (posttraumatic adj1 stress adj1 disorder:)).mp. (15407)
- 32 adjustment disorder:.mp. (392)
- 33 (schizophrenia or personality disorder:).mp. [mp=title, subject heading word, abstract, instrumentation] (6524)
- 34 or/12-14,17-23,25-28,30-33 (58723)
- 35 and/4,11,34 (87)
- 36 from 35 keep 1-87 (87)

*CINAHL emotional 2 search strategy*

While the staff of HealthSearch makes every effort to ensure that the information gathered is accurate and up-to-date, HealthSearch disclaims any warranties regarding the accuracy or completeness of the information or its fitness for a particular purpose. HealthSearch provides information from public sources both in electronic and print formats and does not guarantee its accuracy, completeness or reliability. The information provided is only for the use of the Client and no liability is accepted by HealthSearch to third parties.

Database: CINAHL - Cumulative Index to Nursing & Allied Health Literature <1982 to March Week 4 2007>

Search Strategy:

- 
- 1 demyelinating diseases/ or multiple sclerosis/ (3826)
  - 2 (multiple sclerosis or demyelinating disease: or disseminated sclerosis).mp. (4072)
  - 3 (clinically isolated syndrome: or first demyelinating event).mp. (21)
  - 4 or/1-3 (4072)
  - 5 exp case control studies/ or prospective studies/ (64702)
  - 6 Retrospective Design/ (21967)
  - 7 Clinical Trials/ (32434)
  - 8 exp Clinical Research/ (5682)
  - 9 Meta Analysis/ (5176)
  - 10 (cohort stud: or longitudinal stud: or follow up stud: or prospective stud: or (case adj1 control: adj1 stud:) or retrospective stud: or (randomi: adj1 control: adj1 trial:) or meta analysis or meta-analysis or metaanalysis or review: or case series).mp. (164763)
  - 11 or/5-10 (193101)
  - 12 exp Somatoform Disorders/ (762)
  - 13 somatization disorder:.mp. (28)
  - 14 conversion disorder:.mp. (61)
  - 15 pain disorder:.mp. (1482)
  - 16 hypochondriasis.mp. (114)
  - 17 factitious disorder:.mp. (85)
  - 18 Malingering/ (143)
  - 19 malinger:.mp. (182)
  - 20 exp Sleep Disorders/ (5428)
  - 21 sleep disorder:.mp. (2616)
  - 22 exp Bereavement/ (4365)
  - 23 bereavement:.mp. (2512)
  - 24 academic problem:.mp. (115)
  - 25 Stress, Occupational/ (5725)
  - 26 occupational problem:.mp. (247)
  - 27 exp patient compliance/ or treatment refusal/ (10911)
  - 28 Self Administration/ (1000)
  - 29 treatment noncompl:.mp. (14)
  - 30 euphoria.mp. (51)
  - 31 (pathological adj1 (laugh: or weep: or crying)).mp. (7)
  - 32 pseudobulbar palsy.mp. (6)
  - 33 emotional incontinence.mp. (1)
  - 34 patient abuse/ or verbal abuse/ or domestic violence/ or elder abuse/ or exp partner abuse/ or sexual abuse/ or rape/ (8257)

35 (abuse: or neglect:).mp. (30709)  
 36 problem:.mp. (62222)  
 37 and/35-36 (4721)  
 38 physical abuse:.mp. (949)  
 39 sexual abuse:.mp. (3812)  
 40 exp Mental Disorders/ (96695)  
 41 general medical condition:.mp. (33)  
 42 relational problem:.mp. (8)  
 43 42 and (40 or 41) (4)  
 44 (parent: adj1 child: adj1 relation: adj1 disorder:).mp. (674)  
 45 (partner: adj1 relation: adj1 disorder:).mp. (20)  
 46 (sibling adj1 relation: adj1 disorder:).mp. (23)  
 47 exp Movement Disorders/ (4021)  
 48 (medication adj1 induced adj1 disorder:).mp. (3)  
 49 and/47-48 (0)  
 50 medical condition:.mp. (1818)  
 51 medical illness:.mp. (1180)  
 52 psychological factor:.mp. (8035)  
 53 mental disorder:.mp. (13356)  
 54 psychological symptom:.mp. (1627)  
 55 personality trait:.mp. (429)  
 56 personality/ (1921)  
 57 coping/ or symptom distress/ (9774)  
 58 (coping behaviour or coping behavior).mp. (953)  
 59 coping style:.mp. (610)  
 60 maladaptive health behavior:.mp. (0)  
 61 stress/ or stress, psychological/ or critical incident stress/ or reality shock/ or role stress/ or  
 stress, occupational/ or burnout, professional/ (16561)  
 62 stress related physiological response:.mp. (0)  
 63 exp Sexual Dysfunction, Female/ (853)  
 64 exp sexual dysfunction,male/ (1932)  
 65 sexual dysfunction:.mp. (1183)  
 66 or/50-51 (2959)  
 67 or/52-59,61 (44711)  
 68 and/66-67 (309)  
 69 or/63-65 (2469)  
 70 or/40,53 (97210)  
 71 41 and (69 or 70) (15)  
 72 or/12-34,37-39,43-46,48-49,68,71 (44781)  
 73 and/4,11,72 (15)

*CINAHL intervention search strategy*

While the staff of HealthSearch makes every effort to ensure that the information gathered is accurate and up-to-date, HealthSearch disclaims any warranties regarding the accuracy or completeness of the information or its fitness for a particular purpose. HealthSearch provides information from public sources both in electronic and print formats and does not guarantee its accuracy, completeness or reliability. The information provided is only for the use of the Client and no liability is accepted by HealthSearch to third parties.

Database: CINAHL - Cumulative Index to Nursing & Allied Health Literature <1982 to March Week 4 2007>

Search Strategy:

- 
- 1 demyelinating diseases/ or multiple sclerosis/ (3826)
  - 2 (multiple sclerosis or demyelinating disease: or disseminated sclerosis).mp. (4072)
  - 3 (clinically isolated syndrome: or first demyelinating event).mp. (21)
  - 4 or/1-3 (4072)
  - 5 exp case control studies/ or prospective studies/ (64702)
  - 6 Retrospective Design/ (21967)
  - 7 Clinical Trials/ (32434)
  - 8 exp Clinical Research/ (5682)
  - 9 Meta Analysis/ (5176)
  - 10 (cohort stud: or longitudinal stud: or follow up stud: or prospective stud: or (case adj1 control: adj1 stud:) or retrospective stud: or (randomi: adj1 control: adj1 trial:) or meta analysis or meta-analysis or metaanalysis or review: or case series).mp. (164763)
  - 11 or/5-10 (193101)
  - 12 exp Antidepressive Agents/ (4759)
  - 13 exp Serotonin Uptake Inhibitors/ (2263)
  - 14 selective serotonin reuptake inhibitor:.mp. (425)
  - 15 ssri:.mp. (432)
  - 16 antidepressant:.mp. (2185)
  - 17 tca:.mp. (120)
  - 18 maoi:.mp. (44)
  - 19 exp Monoamine Oxidase Inhibitors/ (344)
  - 20 enzyme inhibitors/ (820)
  - 21 exp Antianxiety Agents/ (2161)
  - 22 anxiolytic:.mp. (208)
  - 23 exp Tranquilizing Agents/ (5134)
  - 24 tranquiliz:.mp. (331)
  - 25 exp Antipsychotic Agents/ (3059)
  - 26 antipsychotic:.mp. (2356)
  - 27 neuroleptic:.mp. (501)
  - 28 Psychotropic Drugs/ (1276)
  - 29 "St. John's Wort"/ (472)
  - 30 (st johns wort or saint johns wort or st john's wort or saint john's wort).mp. (525)
  - 31 Rehabilitation, Cognitive/ (559)
  - 32 cognition disorders/rh (154)
  - 33 cognitive rehabilitation.mp. (764)
  - 34 behavior therapy/ or cognitive therapy/ (4590)
  - 35 Psychotherapy/ (3487)

- 36 (behavior therap: or behaviour therap:).mp. (3782)
- 37 (cognitive behavior therapy: or cognitive behaviour therap: or cognitive behavioral therap:  
or cognitive behavioural therap:).mp. (1207)
- 38 exp Psychological Tests/ (32804)
- 39 psychological test:.mp. (19585)
- 40 psychological screening test:.mp. (248)
- 41 psychometric test:.mp. (317)
- 42 psychiatric interview:.mp. (1605)
- 43 psychological interview:.mp. (7516)
- 44 neuropsychological test:.mp. (6501)
- 45 neuropsychological batter:.mp. (86)
- 46 exp Psychotherapy/ (39183)
- 47 individual psychotherapy.mp. (41)
- 48 psychotherapy, group/ or family therapy/ (2143)
- 49 Couples Counseling/ (328)
- 50 (psychotherap: or group psychotherap: or family tehrap: or couple therap: or couples  
therap:).mp. (6159)
- 51 Stress Management/ (2794)
- 52 STRESS/pc or STRESS, OCCUPATIONAL/pc or STRESS, PSYCHOLOGICAL/pc  
(1551)
- 53 Relaxation/ (588)
- 54 relaxation techniques/ or meditation/ (1945)
- 55 mindfulness.mp. (146)
- 56 (stress management or relaxation or meditation or mindulness).mp. (7326)
- 57 or/12-56 (92408)
- 58 and/4,10,57 (113)
- 59 family therap:.mp. (2095)
- 60 and/4,10,59 (0)

***EMBASE search strategy****EMBASE emotional search strategy*

While the staff of HealthSearch makes every effort to ensure that the information gathered is accurate and up-to-date, HealthSearch disclaims any warranties regarding the accuracy or completeness of the information or its fitness for a particular purpose. HealthSearch provides information from public sources both in electronic and print formats and does not guarantee its accuracy, completeness or reliability. The information provided is only for the use of the Client and no liability is accepted by HealthSearch to third parties.

Database: EMBASE <1980 to 2007 Week 13>

Search Strategy:

- 
- 1 demyelinating disease/ or multiple sclerosis/ (29164)
  - 2 (multiple sclerosis or demyelinating disease: or disseminated sclerosis or clinically isolated syndrome: or first demelinating event).mp. (32080)
  - 3 or/1-2 (32080)
  - 4 Emotional Disorder/ (2251)
  - 5 exp Mood Disorder/ (141085)
  - 6 exp depression/ or mania/ or hypomania/ or manic psychosis/ (130093)
  - 7 anxiety/ (40193)
  - 8 exp anxiety disorder/ (58203)
  - 9 Adjustment Disorder/ (364)
  - 10 depressed mood:.mp. (1823)
  - 11 9 and (7 or 10) (35)
  - 12 adjustment disorder:.mp. (945)
  - 13 (adjustment disorder: and anxiety).mp. (421)
  - 14 10 and 12 (103)
  - 15 or/9,11-14 (945)
  - 16 exp psychosis/ (87535)
  - 17 exp Personality Disorder/ (18573)
  - 18 exp factitious disease/ or exp somatoform disorder/ (7448)
  - 19 malingering/ (1115)
  - 20 exp Sleep Disorder/ (60154)
  - 21 patient compliance/ or treatment refusal/ (38068)
  - 22 bereavement/ (2274)
  - 23 exp academic achievement/ (12428)
  - 24 burnout/ or job performance/ or job stress/ (10169)
  - 25 euphoria/ (1724)
  - 26 emotional incontinence/ or pathological crying/ or pathological laughter/ or screaming syndrome/ (142)
  - 27 Pseudobulbar Palsy/ (80)
  - 28 involuntary emotional expression disorder:.mp. (1)
  - 29 (pathological adj1 (laugh: or crying or weeping)).mp. (223)
  - 30 sexual abuse/ (6821)
  - 31 physical abus:.mp. (1660)
  - 32 adult/ (1893598)
  - 33 32 and (30 or 31) (2976)
  - 34 Neglect/ (2291)

35 (problem: and abus:).mp. (14171)  
36 problem:.mp. (338303)  
37 34 and 36 (312)  
38 exp Mental Disease/ (606866)  
39 general medical condition:.mp. (253)  
40 mental disorder:.mp. (13831)  
41 relational problem:.mp. (70)  
42 41 and (38 or 39 or 40) (35)  
43 maternal deprivation/ or sibling relation/ or exp child parent relation/ (19977)  
44 marriage/ (10938)  
45 exp Motor Dysfunction/ (206572)  
46 medication induced disorder:.mp. (3)  
47 Drug Induced Disease/ (22764)  
48 (46 or 47) and 45 (1873)  
49 (medical condition: or medical illness:).mp. (8772)  
50 psychological aspect/ (132754)  
51 exp personality/ (137813)  
52 exp coping behavior/ (16686)  
53 exp Maladjustment/ (6128)  
54 exp Sexual Dysfunction/ (24584)  
55 cohort analysis/ or meta analysis/ (69566)  
56 case control study/ or longitudinal study/ or prospective study/ or retrospective study/  
(163611)  
57 follow up/ (218009)  
58 "Review"/ (797713)  
59 or/55-58 (1158256)  
60 or/50-53 (276588)  
61 and/49,60 (782)  
62 39 and (38 or 40 or 54) (135)  
63 or/4-8,15-29,33,35,37,42-44,46-48,61-62 (418218)  
64 and/3,59,63 (919)  
65 limit 64 to human (906)  
66 and/3,63 (2452)  
67 limit 66 to (human and "review") (735)  
68 or/65,67 (906)

*EMBASE intervention search strategy*

While the staff of HealthSearch makes every effort to ensure that the information gathered is accurate and up-to-date, HealthSearch disclaims any warranties regarding the accuracy or completeness of the information or its fitness for a particular purpose. HealthSearch provides information from public sources both in electronic and print formats and does not guarantee its accuracy, completeness or reliability. The information provided is only for the use of the Client and no liability is accepted by HealthSearch to third parties.

Database: EMBASE <1980 to 2007 Week 13>

Search Strategy:

- 
- 1 demyelinating disease/ or multiple sclerosis/ (29164)
  - 2 (multiple sclerosis or demyelinating disease: or disseminated sclerosis or clinically isolated syndrome: or first demelinating event).mp. (32080)
  - 3 or/1-2 (32080)
  - 4 cohort analysis/ or meta analysis/ (69566)
  - 5 case control study/ or longitudinal study/ or prospective study/ or retrospective study/ (163611)
  - 6 follow up/ (218009)
  - 7 "Review"/ (797713)
  - 8 or/4-7 (1158256)
  - 9 antidepressant agent/ or adatsanerin/ or agomelatine/ or alaproclate/ or amfebutamone/ or "1 amino 1 [1 (4 chlorophenyl)cyclobutyl] 3 methylbutane"/ or "2 amino 3 (3,4 dichlorobenzoyloxy) 6 fluorobicyclo[3.1.0]hexane 2,6 dicarboxylic acid"/ or anpirtoline/ or aprepitant/ or befuraline/ or benmoxin/ or "2 [3 (1,3 benzodioxol 5 yloxy)propylaminomethyl] 1,4 benzodioxan"/ or binedaline/ or "butyl[2,5 dimethyl 7 (2,4,6 trimethylphenyl) 7h pyrrolo[2,3 d]pyrimidin 4 yl]ethylamine"/ or "1 [5 chloro 1 (2,4 dimethoxyphenylsulfonyl) 2,3 dihydro 3 (2 methoxyphenyl) 2 oxo 1h indol 3 yl] 4 hydroxy n,n dimethyl 2 pyrrolidinecarboxamide"/ or "1 [1 (4 chlorophenyl)cyclobutyl] 3 methyl 1 methylaminobutane"/ or "5 (4 chlorophenyl) 2,4 dihydro 2,4 dimethyl 3h 1,2,4 triazole 3 thione"/ or ciclazindol/ or cilobamine/ or clemeprol/ or clorotepine/ or clovoxamine/ or cotinine/ or diclofensine/ or "4,5 dihydro 5 (4 phenyl 1 piperazinylmethyl) 2 oxazolamine"/ or "3 (6 dimethylamino 4 methyl 3 p! yridinyl) 7 dipropylamino 2,5 dimethylpyrazolo[1,5 a]pyrimidine"/ or "4 (5,6 dimethyl 2 benzofuranyl)piperidine"/ or eclanamine/ or eclanamine maleate/ or etoperidone/ or fengabine/ or fezolamine/ or fezolamine fumarate/ or flerobuterol/ or flibanserin/ or "5 fluoro 3 [3 [4 (5 methoxy 4 pyrimidinyl) 1 piperaziny]propyl] 1h indole"/ or fluparoxan/ or gamfexine/ or gepirone/ or 2' hydroxyminaprine/ or 5 hydroxytryptophan/ or indalpine/ or ipsapirone/ or lithium acetate/ or lithium carbonate/ or lithium chloride/ or lithium citrate/ or lithium gluconate/ or lithium hydroxybutyrate/ or lithium salt/ or lithium sulfate/ or lortalamine/ or metralindole/ or minaprine/ or moxiraprine/ or netamiftide/ or nomifensine/ or nomifensine maleate/ or optimax/ or oxaflozane/ or panuramine/ or "3 phenyl 1 [(1,2,3,4 tetrahydro 5,6 methylenedioxy 1 naphthyl)methyl]pyrrolidine"/ or piberaline/ or pirandamine/ or progabide/ or prosulpride/ or rolipram/ or rolipram derivative/ or sunepitron/ or ! talsupram/ or tametraline/ or teniloxazine/ or tiflucarbine/ o! r tofiso pam/ or trazium esilate/ or trazodone/ or vestipitant/ or viloxazine/ or viqualine/ or zometapine/ (60045)
  - 10 exp Serotonin Uptake Inhibitor/ (47548)
  - 11 exp Tricyclic Antidepressant Agent/ (58940)

- 12 exp Monoamine Oxidase Inhibitor/ (23955)
- 13 tranquilizer/ or exp anxiolytic agent/ or exp neuroleptic agent/ or exp atypical antipsychotic agent/ (178210)
- 14 Hypericum Perforatum/ (922)
- 15 cognitive rehabilitation/ (82)
- 16 cognitive rehabilitation.tw. (364)
- 17 cognitive therapy/ (11920)
- 18 behavior therapy/ (18515)
- 19 behaviour therap:.tw. (1031)
- 20 (cognitive-behaviour therapy or cognitive behavioral therapy or cognitive behavior therapy or cognitive behavioural therapy).tw. (3308)
- 21 antipsychotic:.tw. (14217)
- 22 exp psychologic test/ (49935)
- 23 psychological screening test:.tw. (15)
- 24 exp psychometry/ (17584)
- 25 psychiatric interview:.mp. (1090)
- 26 neuropsychological batter:.tw. (895)
- 27 psychotherapy/ or family therapy/ or group therapy/ or marital therapy/ (40685)
- 28 individual psychotherap:.tw. (542)
- 29 stress/ or adaptation syndrome/ (58069)
- 30 relaxation training/ (2903)
- 31 meditation/ (1025)
- 32 mindfulness.mp. (263)
- 33 or/9-32 (420105)
- 34 and/3,8,33 (744)
- 35 limit 34 to human (717)

***PsychINFO search strategy***

While the staff of HealthSearch makes every effort to ensure that the information gathered is accurate and up-to-date, HealthSearch disclaims any warranties regarding the accuracy or completeness of the information or its fitness for a particular purpose. HealthSearch provides information from public sources both in electronic and print formats and does not guarantee its accuracy, completeness or reliability. The information provided is only for the use of the Client and no liability is accepted by HealthSearch to third parties.

Database: PsycINFO <1967 to March Week 4 2007>

Search Strategy:

- 
- 1 multiple sclerosis/ (2090)
  - 2 (multiple sclerosis or demyelinating disease: or clinically isolated syndrome: or first demyelinating event).mp. (2680)
  - 3 disseminated sclerosis.mp. (2)
  - 4 or/1-3 (2681)
  - 5 (emotional disorder: or emotional symptom: or affective disorder: or affective symptom: or mood disorder: or mood swing:).mp. (22493)
  - 6 exp Affective Disorders/ (71328)
  - 7 "depression (emotion)"/ (18802)
  - 8 (depression or depressive symptom: or clinical depression or major depressive disorder: or dysthymic disorder: or minor depression or masked depression or "pseudodementia of depression" or bipolar disorder: or mania or hypomania).mp. (126530)
  - 9 exp anxiety/ (32979)
  - 10 exp anxiety disorders/ (37617)
  - 11 (anxiety or anxiety symptom: or panic disorder: or phobia: or obsessive compulsive disorder: or posttraumatic stress disorder: or acute stress disorder: or generalized anxiety disorder:).mp. (107922)
  - 12 adjustment disorders/ (291)
  - 13 exp anxiety/ or depressed mood:.mp. (35270)
  - 14 and/12-13 (45)
  - 15 exp psychosis/ (62033)
  - 16 schizoaffective disorder/ (1813)
  - 17 exp schizophrenia/ (48849)
  - 18 (psychosis or psychotic disorder: or schizophrenia or schizophreniform disorder: or shizoaffective disorder: or delusional disorder:).mp. (76183)
  - 19 adjustment disorder:.mp. (1163)
  - 20 (adjustment disorder: and (anxiety or depressed mood:)).mp. (531)
  - 21 exp personality disorders/ (13761)
  - 22 personality disorder:.mp. (21599)
  - 23 exp Somatoform Disorders/ (8175)
  - 24 exp factitious disorders/ (455)
  - 25 malingering/ (1156)
  - 26 (somatoform disorder: or somatization disorder: or conversion disorder: or pain disorder: or hypochondriasis or factitious disorder: or malinger:).mp. (11150)
  - 27 exp sleep disorders/ (5554)
  - 28 sleep disorder:.mp. (4076)
  - 29 euphoria/ (175)
  - 30 euphoria.mp. (833)

- 31 (pathological adj1 (laugh: and crying)).mp. (42)
- 32 (pathological adj1 (laugh: and weeping)).mp. (6)
- 33 (pseudobulbar palsy or emotional incontinen:).mp. (51)
- 34 involuntary emotional expression disorder:.mp. (1)
- 35 treatment compliance/ (6389)
- 36 treatment dropouts/ (1629)
- 37 treatment refusal/ (430)
- 38 grief/ (7338)
- 39 academic underachievement/ (1871)
- 40 occupational adjustment/ (1410)
- 41 occupational stress/ (10205)
- 42 (treatment compl: or treatment refus: or treatment dropout: or bereavement or academic problem: or occupational problem:).mp. (13967)
- 43 physical abuse/ (3355)
- 44 sexual abuse/ or exp rape/ (14647)
- 45 (problem: and (abuse or neglect:)).mp. [mp=title, abstract, heading word, table of contents, key concepts] (22823)
- 46 mental disorders/ (40066)
- 47 mental disorders due to general medical conditions/ (30)
- 48 general medical condition:.mp. (224)
- 49 relational disorder:.mp. (58)
- 50 49 and (46 or 48) (17)
- 51 (parent child relational disorder: or partner relational disorder: or sibling relational disorder:).mp. (2)
- 52 exp movement disorders/ (10674)
- 53 medication induced disorder:.mp. (2)
- 54 and/52-53 (0)
- 55 medical condition:.mp. (2537)
- 56 (psychological adj1 (factor: or symptom:)).mp. (9138)
- 57 mental disorder:.mp. (57523)
- 58 exp personality traits/ (140899)
- 59 personality trait:.mp. (33619)
- 60 coping behavior/ (25798)
- 61 coping style:.mp. (3854)
- 62 (maladaptive health behavior: or maladaptive health behaviour:).mp. (5)
- 63 stress related physiological response:.mp. (1)
- 64 exp sexual function disturbances/ (4299)
- 65 or/46,56-63 (230047)
- 66 and/55,65 (542)
- 67 sexual dysfunction:.mp. (2947)
- 68 48 and (46 or 57) (114)
- 69 48 and (64 or 67) (5)
- 70 exp Experimental Design/ (36897)
- 71 case series.mp. (744)
- 72 meta analysis/ (2705)
- 73 exp Retrospective Studies/ (278)
- 74 ((randomized adj1 control: adj1 trial:) or cohort: or case control: or case series or review: or meta-analysis or metaanalysis or meta analysis).mp. (241067)
- 75 "literature review"/ (22014)
- 76 or/70-75 (273361)
- 77 or/5-12,14-45,47,50-51,53-54,66,68-69 (350651)

- 78 and/4,77 (800)
- 79 limit 78 to (human and ("0430 followup study" or "0450 longitudinal study" or "0451 prospective study" or "0452 retrospective study" or "0800 literature review" or 1200 meta analysis or "2000 treatment outcome/randomized clinical trial")) (103)
- 80 and/4,76-77 (143)
- 81 limit 80 to human (136)
- 82 or/79,81 (181)
- 83 from 82 keep 1-181 (181)
