# Supplementary material
Source: PubMed Central journal article supplement (PMC3897434)
Supplement: supp_WNL.0000000000000013_Appendix_e-6_Prevalence_references_reviewed_by_panel.pdf [file supp_WNL.0000000000000013_Appendix_e-6_Prevalence_references_reviewed_by_panel.pdf]

## **Appendix e-6: Prevalence references reviewed by panel but not cited in article**

- Gottberg K, Einarsson U, Fredrikson S, von Koch L, Holmqvist LW. A population-based study of depressive symptoms in multiple sclerosis in Stockholm county: association with functioning and sense of coherence. *J Neurol Neurosurg Psychiatry* 2007;78:60–65.
- Patten SB, Svenson LW, Metz LM. Descriptive epidemiology of affective disorders in multiple sclerosis. *CNS Spectr* 2005;10:365–371.
- Arias Bal MA, Vázquez-Barquero JL, Peña C, Miro J, Berciano JA. Psychiatric aspects of multiple sclerosis. *Acta Psychiatr Scand* 1991;83:292–296.
- Fishman I, Benedict RH, Bakshi R, Priore R, Weinstock-Guttman B. Construct validity and frequency of euphoria sclerotica in multiple sclerosis. *J Neuropsychiatry Clin Neurosci* 2004;16(3):350–356.
- Surridge D. An investigation into some psychiatric aspects of multiple sclerosis. *Br J Psychiatry* 1969;115:749–764.
- Chwastiak L, Ehde DM, Gibbons LE, Sullivan M, Bowen JD, Kraft GH. Depressive symptoms and severity of illness in multiple sclerosis: epidemiologic study of a large community sample. *Am J Psychiatry* 2002;159:1862–1868.
- Feinstein A, Kartsounis LD, Miller DH, Youl BD, Ron MA. Clinically isolated lesions of the type seen in multiple sclerosis: a cognitive, psychiatric, and MRI follow up study. *J Neurol Neurosurg Psychiatry* 1992;55:869–876.
- Felgenhauer K. Psychiatric disorders in the encephalitic form of multiple sclerosis. *J Neurol* 1990;237:11–18.
- Harel Y, Barak Y, Achiron A. Dysregulation of affect in multiple sclerosis: new phenomenological approach. *Psychiatry Clin Neurosci* 2007;61:94–98.

- Logsdail SJ, Callanan MM, Ron MA. Psychiatric morbidity in patients with clinically isolated lesions of the type seen in multiple sclerosis: a clinical and MRI study. *Psychol Med* 1988;18:355–364.
- Patten SB, Fridhandler S, Beck CA, Metz LM. Depressive symptoms in a treated multiple sclerosis cohort. *Mult Scler* 2003;9:616–620.
- Ron MA, Logsdail SJ. Psychiatric morbidity in multiple sclerosis: a clinical and MRI study. *Psychol Med* 1989;19:887–895.
- Shabani A, Moghadam JA, Panaghi L, Seddigh A. Anxiety disorders in multiple sclerosis: significance of obsessive-compulsive disorder comorbidity. *J Res Med Sci* 2007;12:172–177.
- Turner AP, Williams RM, Bowen JD, Kivlahan DR, Haselkorn JK. Suicidal ideation in multiple sclerosis. *Arch Phys Med Rehabil* 2006;87:1073–1078.
- Verdier-Taillefer MH, Gourlet V, Fuhrer R, Alperovitch A. Psychometric properties of the Center for Epidemiologic Studies-Depression scale in multiple sclerosis. *Neuroepidemiology* 2001;20(4):262–267.
- Vleugels L, Pfenning L, Pouwer F, et al. Psychological functioning in primary progressive versus secondary progressive multiple sclerosis. *Br J Med Psychol* 1998;71:99–106.
- Whitlock FA, Siskind MM. Depression as a major symptom of multiple sclerosis. *J Neurol Neurosurg Psychiatry* 1980;43:861–865.
- Williams RM, Turner AP, Hatzakis M Jr, Bowen JD, Rodriguez AA, Haselkorn JK. Prevalence and correlates of depression among veterans with multiple sclerosis. *Neurology* 2005;64:75–80.

Ytterberg C, Johansson S, Andersson M, et al. Combination therapy with interferon-beta and glatiramer acetate in multiple sclerosis. *Acta Neurol Scand* 2007;116:96–99.

Zabad RK, Patten SB, Metz LM. The association of depression with disease course in multiple sclerosis. *Neurology* 2005;64:359–360.
