# Supplementary material
Source: PubMed Central journal article supplement (PMC3897434)
Supplement: supp_WNL.0000000000000013_E-Methods_clean.pdf [file supp_WNL.0000000000000013_E-Methods_clean.pdf]

## **E-Methods**

In February 2007, we searched the MEDLINE, EMBASE, CINAHL, Web of Science, and Cochrane databases in all languages, using the MeSH term and its text word synonyms and key words for the topics addressed by the clinical questions (see appendix e-3 for search strategy and terms). A total of 4,540 citations were retrieved. We updated the search in August 2011 and identified 605 additional citations, making a combined total 5,145 citations. At least 2 authors reviewed all 5,145 abstracts. The review yielded 953 articles to be submitted to full-text review. Of the 953 articles, 115 were determined to have data relating to one or more of the clinical questions. These were reviewed and classified according to AAN criteria for screening, diagnostic, and therapeutic studies (appendix e-4), resulting in 41 Class I–III studies combined for both searches. We linked recommendations to the strength of evidence (appendix e-5) and intervention effect size. A third reviewer arbitrated discrepant classifications. We excluded case reports, review papers, studies with fewer than 20 subjects, and therapeutic studies that did not specify the psychiatric disorder being treated or report scores on both pre- and posttreatment symptom severity measures. Several articles with prevalence data were evaluated but not cited in the manuscript. These are listed in appendix e-6.
